# Supplementary material for: Agricultural Intensification Exacerbates Spillover Effects on Soil Biogeochemistry in Adjacent Forest Remnants
Source: PubMed Central journal article supplement (PMC4289067; doi:10.1371/journal.pone.0116474), 2015-01-09
Supplement: pone.0116474.s010.pdf [file pone.0116474.s010.pdf]

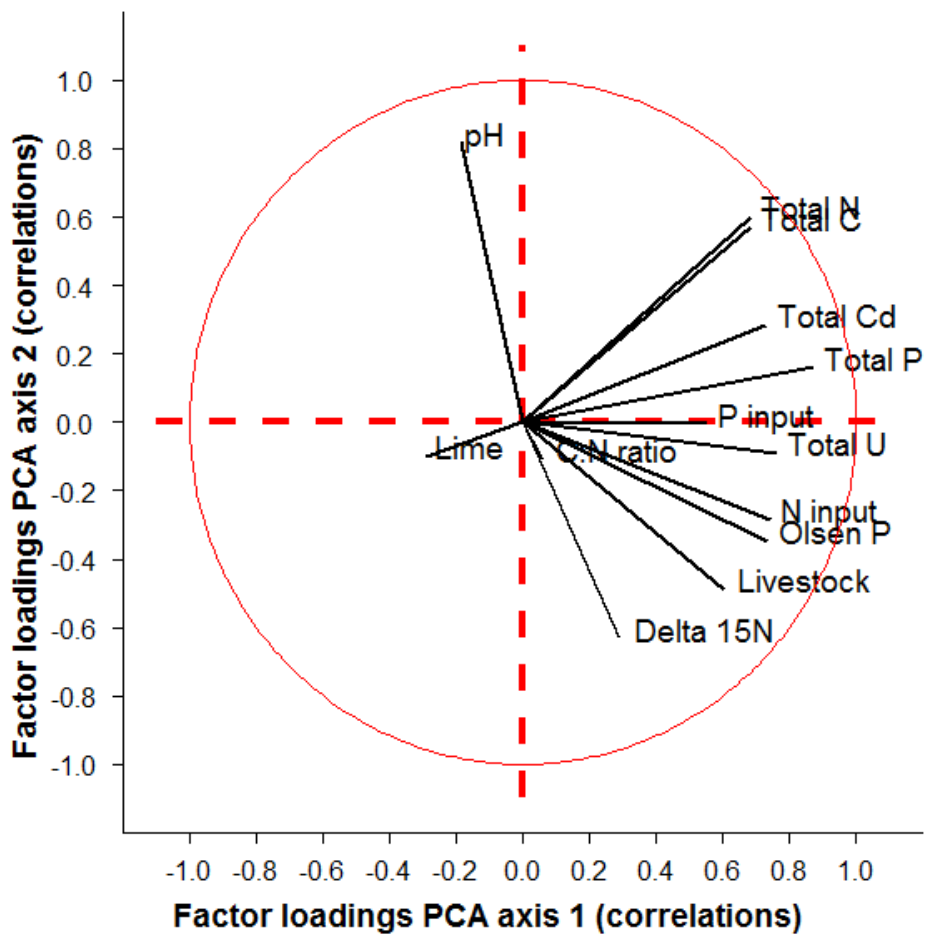

**Figure S2.** Factor loadings (correlations) on PCA axes 1 and 2 showing the dominant farmer input measures and soil biogeochemistry measures driving variation in land-use intensity across farms.
