# Supplementary material for: Agricultural Intensification Exacerbates Spillover Effects on Soil Biogeochemistry in Adjacent Forest Remnants
Source: PubMed Central journal article supplement (PMC4289067; doi:10.1371/journal.pone.0116474), 2015-01-09
Supplement: pone.0116474.s011.pdf [file pone.0116474.s011.pdf]

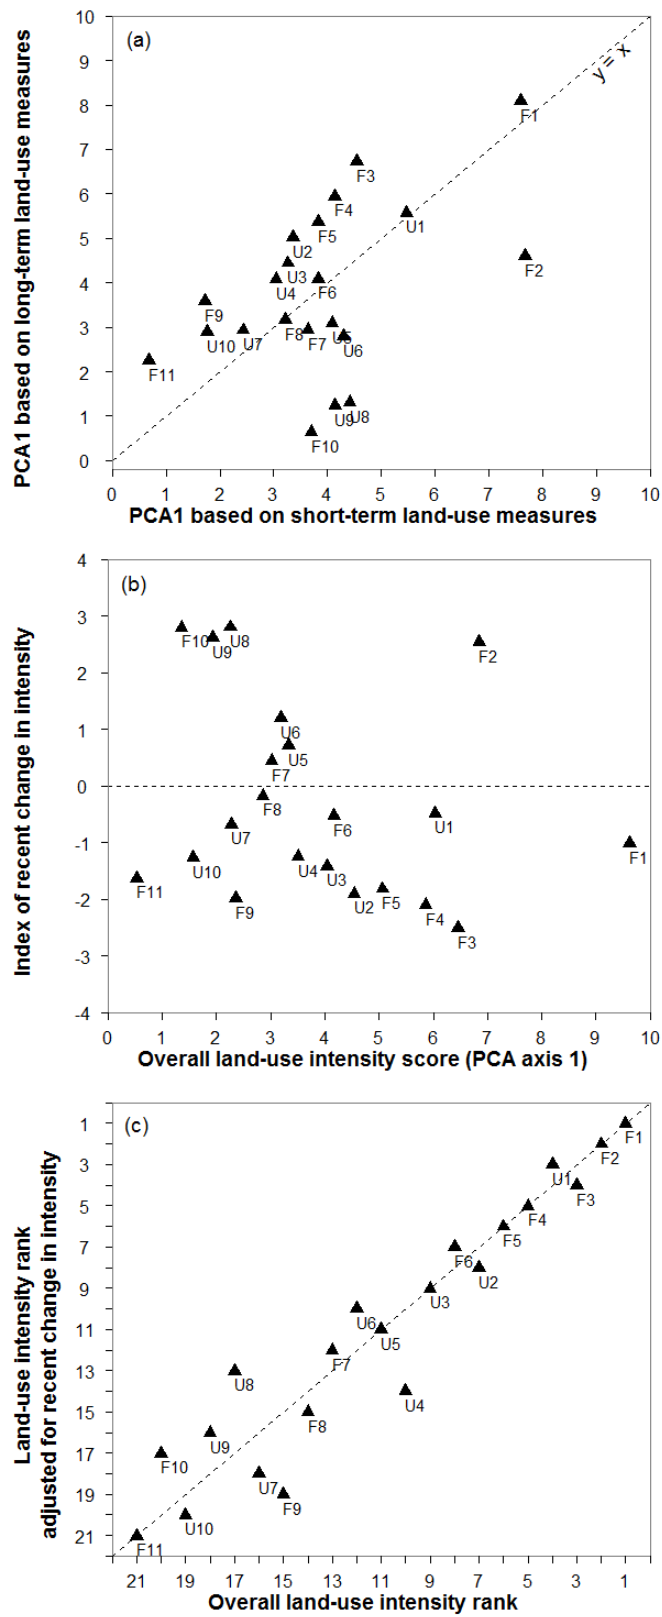

**Figure S3.** Sensitivity test of the influence of using short-term versus longer-term land-use intensity measures to derive a composite overall land-use intensity gradient. See text for explanation.
