# Supplementary material for: Agricultural Intensification Exacerbates Spillover Effects on Soil Biogeochemistry in Adjacent Forest Remnants
Source: PubMed Central journal article supplement (PMC4289067; doi:10.1371/journal.pone.0116474), 2015-01-09
Supplement: pone.0116474.s012.pdf [file pone.0116474.s012.pdf]

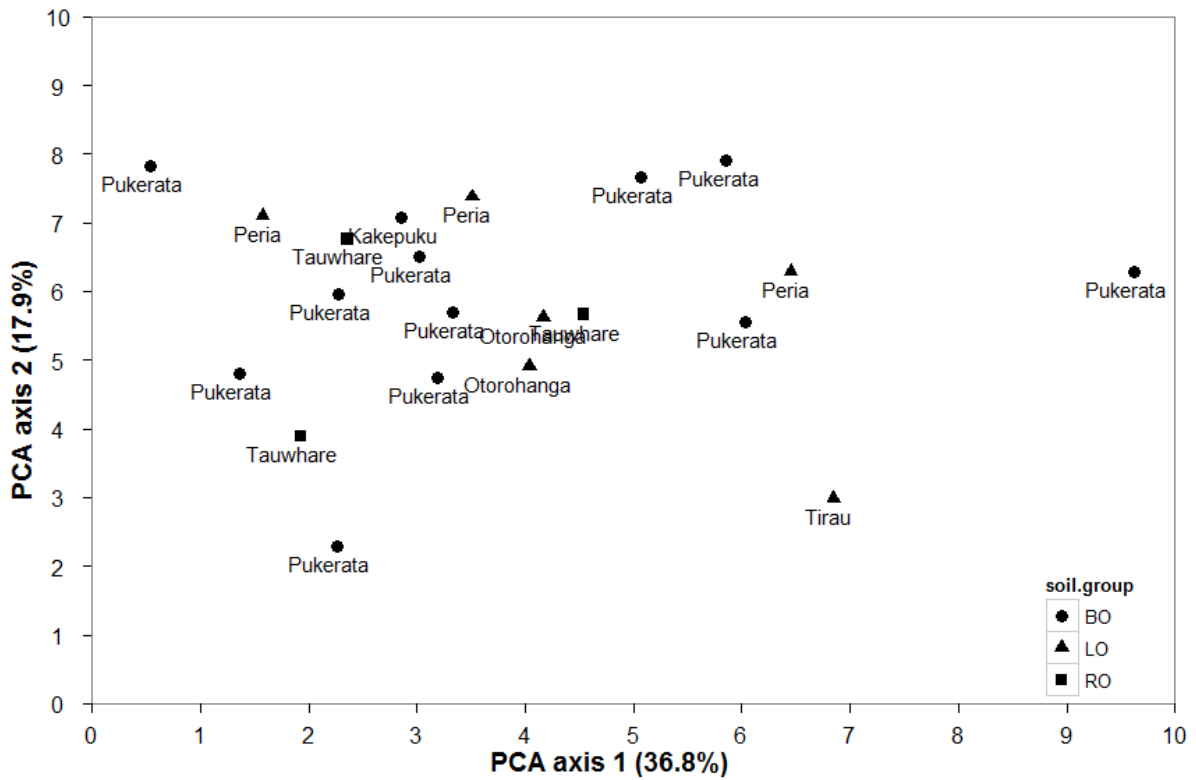

**Figure S4.** The biplot of PCA axes 1 and 2 from Figure 2 (based on all 13 farmer input and soil biogeochemistry measures) re-plotted to show variation in soil groups (symbols: BO = Typic Orthic Brown Soils; LO = Typic Orthic Allophanic Soils; RO = Mottled Orthic Recent Soils) and names of soil types for each farm. No consistent clustering or confounding effect of soil type was evident along the PCA axis 1 land-use intensity gradient.
