# Supplementary material for: Agricultural Intensification Exacerbates Spillover Effects on Soil Biogeochemistry in Adjacent Forest Remnants
Source: PubMed Central journal article supplement (PMC4289067; doi:10.1371/journal.pone.0116474), 2015-01-09
Supplement: pone.0116474.s014.pdf [file pone.0116474.s014.pdf]

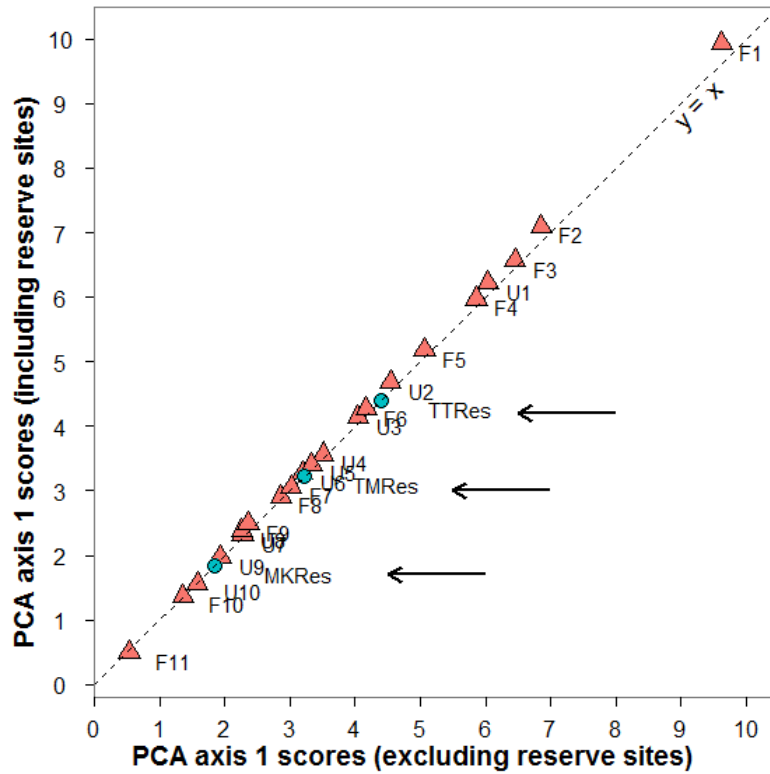

**Figure S6.** Comparative analysis of where farms adjacent to the three forest reference sites (blue circles) were placed along the composite land-use intensity gradient for farms surrounding the 21 forest remnant sites (red triangles). See text for further explanation.
