# Supplementary material for: Agricultural Intensification Exacerbates Spillover Effects on Soil Biogeochemistry in Adjacent Forest Remnants
Source: PubMed Central journal article supplement (PMC4289067; doi:10.1371/journal.pone.0116474), 2015-01-09
Supplement: pone.0116474.s016.pdf [file pone.0116474.s016.pdf]

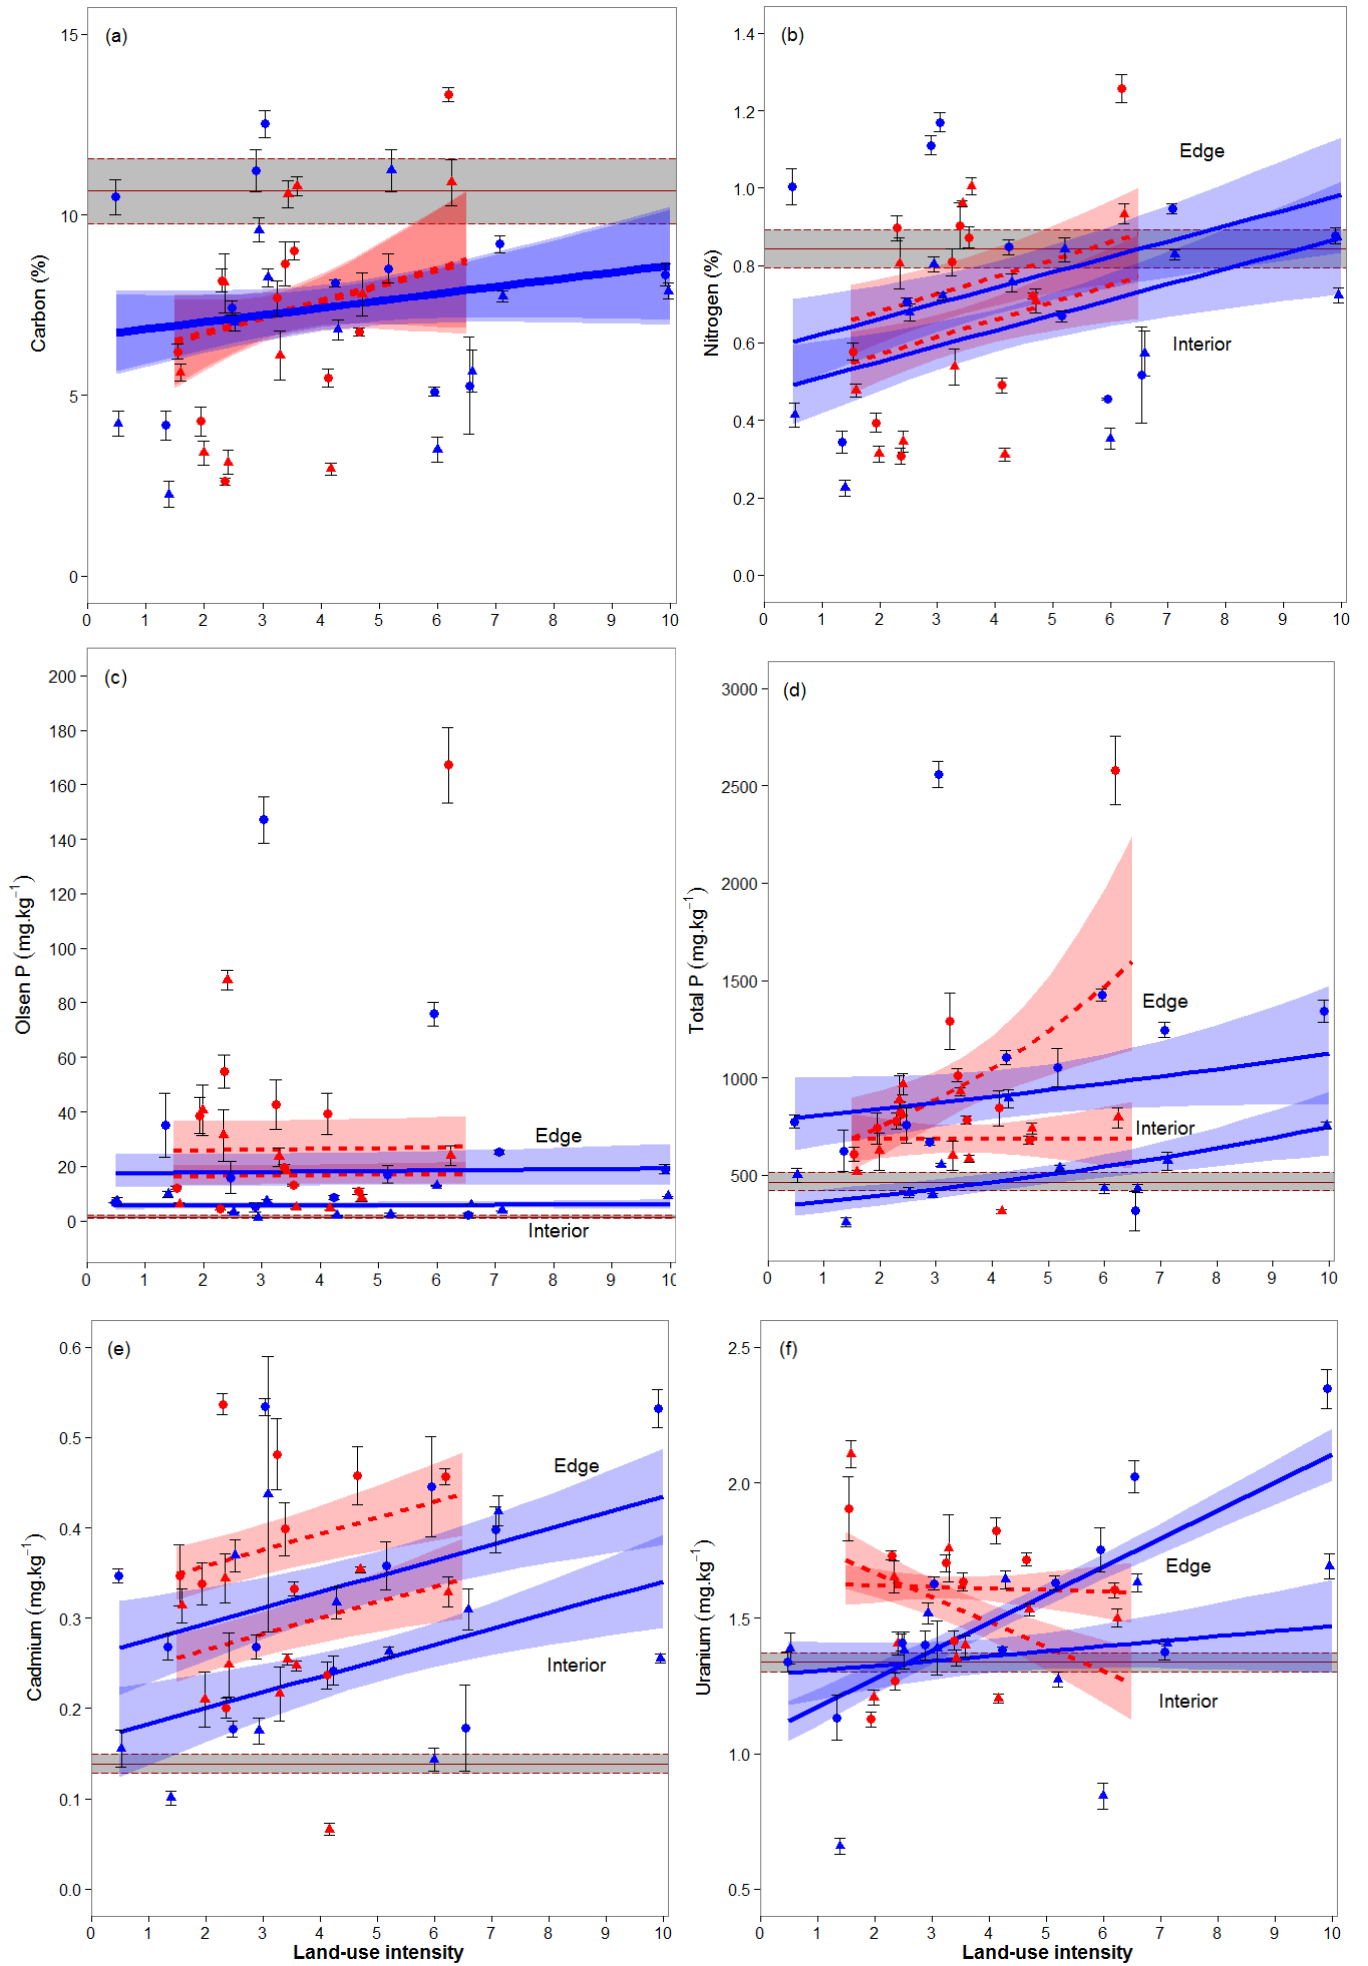

**Figure S8** (*preceding page*). Predicted relationships between surrounding agricultural land-use intensity and soil biogeochemistry within fenced and unfenced forest remnants, re-analysed and plotted as gravimetric response measures rather than as volumetric response measures. See Figure 4 for details.
